# Supplementary material for: Understanding school staff members’ enforcement of school tobacco policies to achieve tobacco-free school: a realist review
Source: Springer Nature journal article supplement (doi:10.1186/s13643-019-1086-5), 2019-07-19
Supplement: MOESM1 [file 16965618]

**Additional file 1 Search strategy**

Two separate search strategies that were refined in collaboration with information specialists were used in order to generate understanding about STPs and their implementation in schools (search strategy 1) as well as health promotion implementation in schools more generally (search strategy 2). Search strategies were translated and searches were undertaken in various databases (see table 1) in order to reflect the multidisciplinary nature of the review, covering tobacco policies, health promotion, implementation and school context. Keyword and MeSH terms were combined in Medline. All searches were limited to English language and the time limit was set to 2000- March 2016.

The full search strategies conducted in Ovid MEDLINE are described below:

Search strategy 1


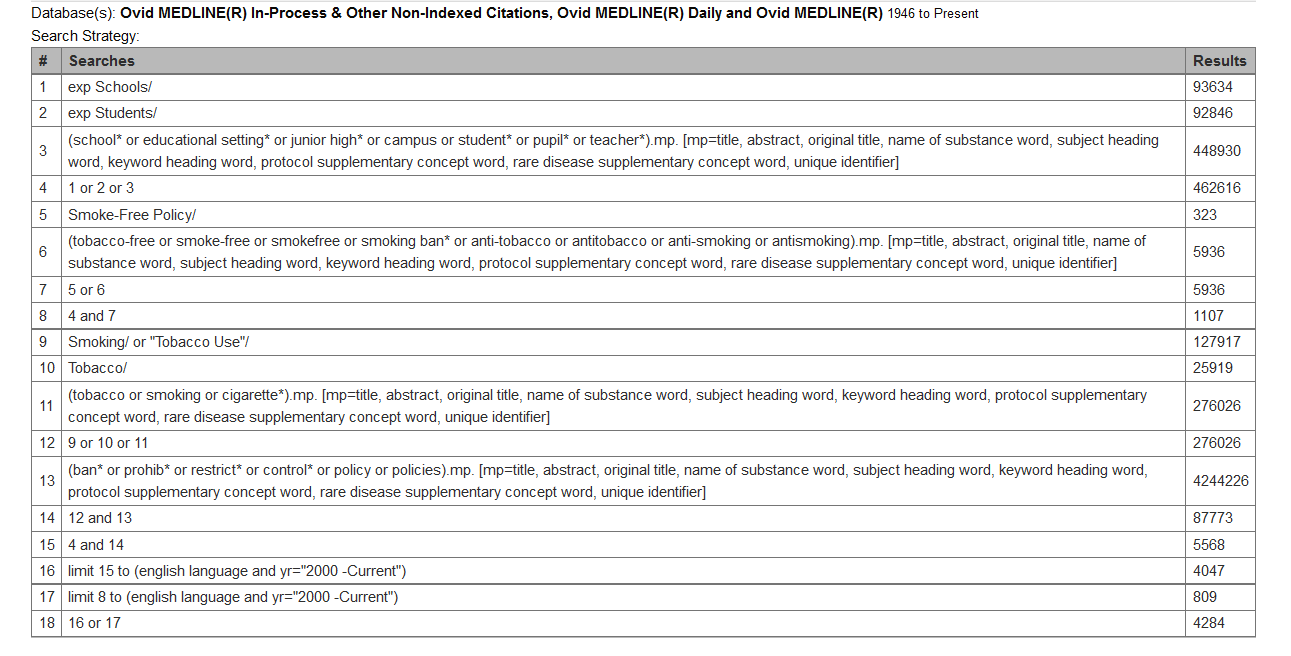


Search strategy 2


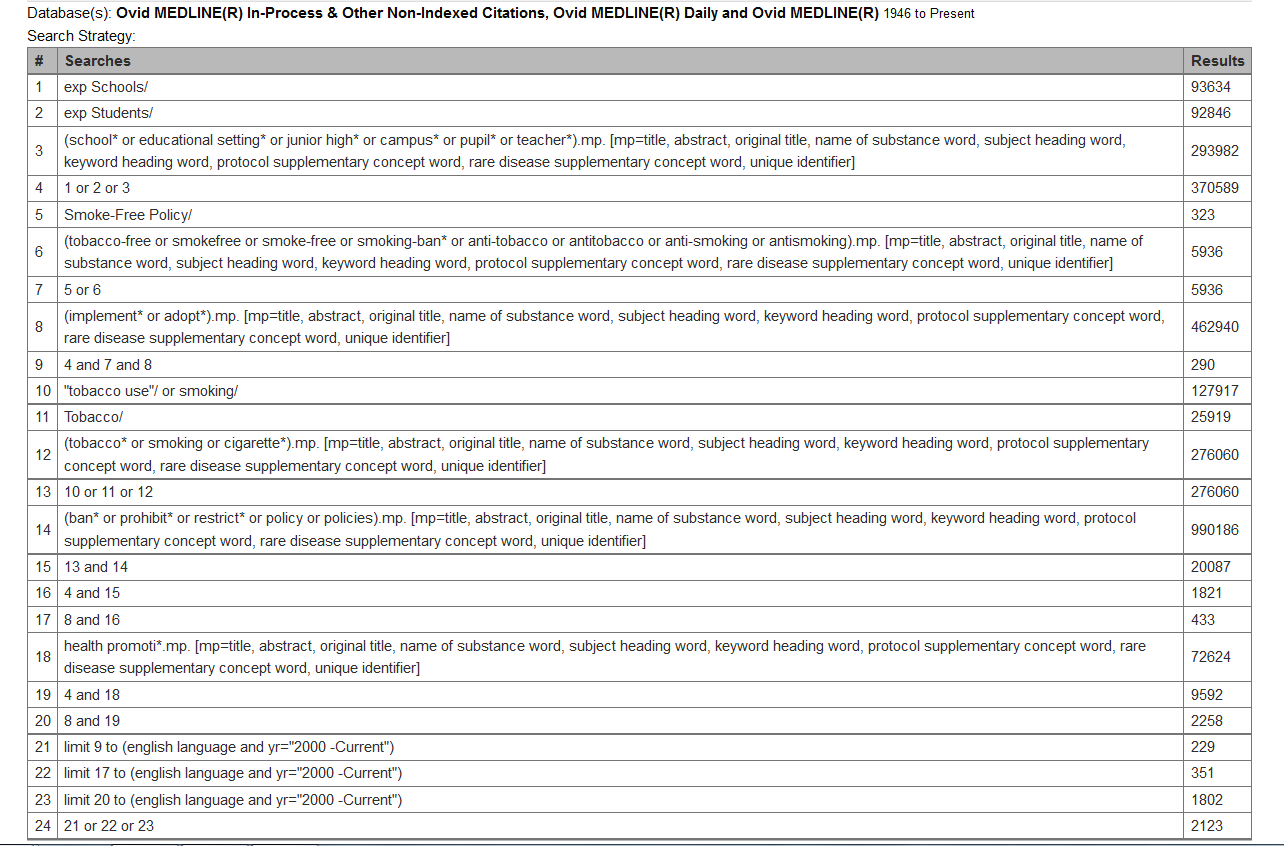


Table 1 Databases searched

| Medline via Ovid |
| --- |
| Academic search premier via EBSCO |
| Education research complete via EBSCO |
| Teacher reference center via EBSCO |
| Education source via EBSCO |
| Applied Social Sciences Index and Abstracts (ASSIA) via Proquest |
| International Bibliography of the Social Sciences (IBSS) via Proquest |
| ProQuest Social Science Journals via Proquest |
| ProQuest Sociology via Proquest |
| Social Services Abstracts via Proquest |
| Sociological Abstracts via Proquest |
| ERIC via Proquest |
| ProQuest Education Journals via Proquest |
| PAIS international via Proquest |
| ProQuest Political Science via Proquest |
| Worldwide political science abstracts via Proquest |
| PsycARTICLES via Proquest |
| PsycInfo via Proquest |
